# Supplementary material
Source: PubMed Central journal article supplement (PMC3133674)
Supplement: NIHMS304565-supplement-01.pdf [file NIHMS304565-supplement-01.pdf]

A.

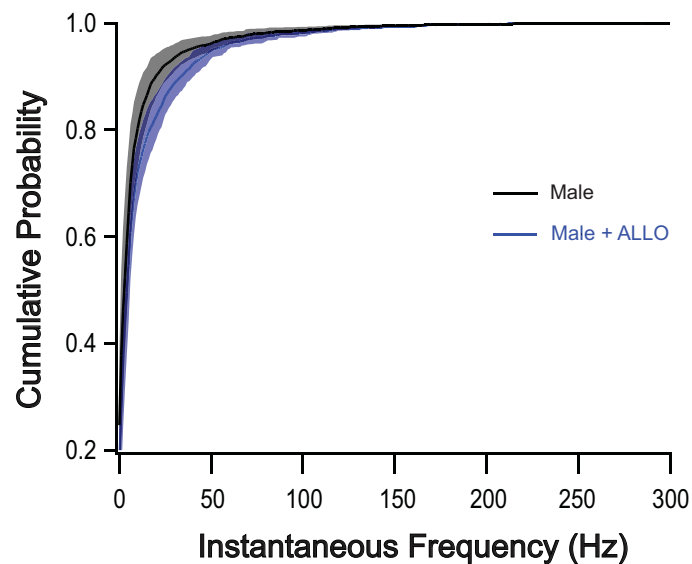

B.

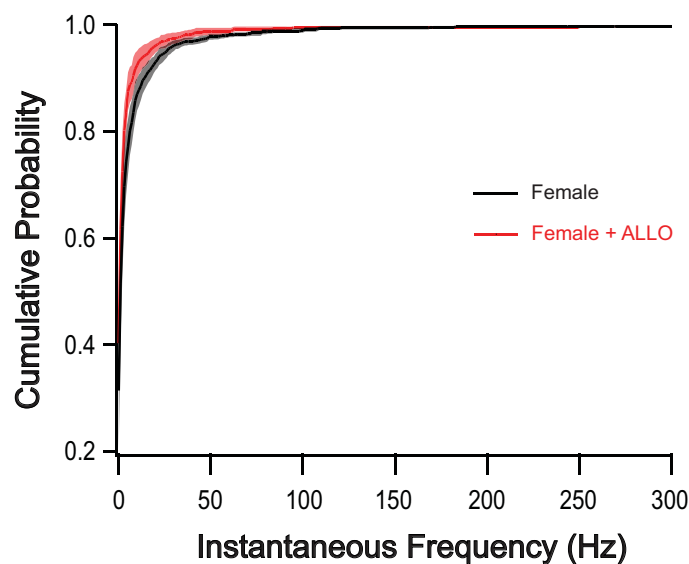

C.

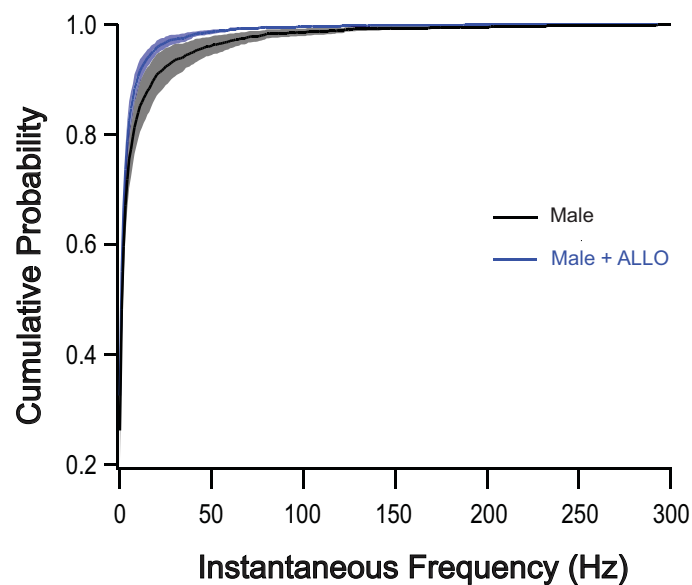

D.

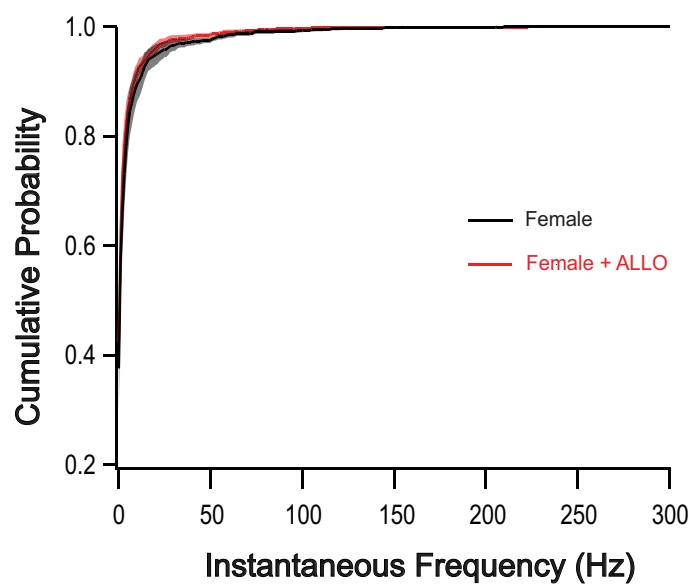

Supplemental Fig. 1 ALLO does not alter miniature or spontaneous IPSC frequency. Cumulative probability of sIPSC instantaneous frequency (a, b) and mIPSC instantaneous frequency (c, d). Control males are depicted in black, ALLO males in blue. Control females are depicted in black, ALLO females in red.
